# Supplementary material
Source: PubMed Central journal article supplement (PMC2141815)
Supplement: pnas_0703333104_5.pdf [file pnas_0703333104_5.pdf]

Table 1. Across-habitat and within habitat RELATE tests between community structure and a distance matrix based on the actual geographical distance between sites. None of the 59 correlations were significant at  $P < 0.05$ .

|                           | All 15 sites |          | Primary forest |          | Secondary forest |          | Eucalyptus plantations |          |
|---------------------------|--------------|----------|----------------|----------|------------------|----------|------------------------|----------|
|                           | Rho          | <i>P</i> | Rho            | <i>P</i> | Rho              | <i>P</i> | Rho                    | <i>P</i> |
| Leaf-litter amphibians    | -0.13        | 0.82     | -0.21          | 0.75     | -0.32            | 0.68     | -0.50                  | 0.92     |
| Epigeic arachnids         | -0.03        | 0.55     | -0.26          | 0.84     | 0.36             | 0.22     | -0.32                  | 0.79     |
| Bats                      | 0.05         | 0.38     | -0.44          | 0.95     | 0.74             | 0.08     | 0.16                   | 0.65     |
| Orchid bees               | -0.14        | 0.84     | 0.07           | 0.51     | -0.25            | 0.67     | 0.39                   | 0.11     |
| Birds                     | 0.07         | 0.22     | 0.001          | 0.42     | -0.35            | 0.83     | 0.06                   | 0.37     |
| Scavenger flies           | -0.01        | 0.51     | 0.62           | 0.09     | 0.24             | 0.25     | 0.25                   | 0.26     |
| Fruit-feeding butterflies | 0.08         | 0.21     | -0.20          | 0.72     | 0.59             | 0.17     | -0.08                  | 0.52     |
| Fruit flies               | -0.16        | 0.89     | 0.54           | 0.07     | 0.36             | 0.17     | 0.08                   | 0.42     |
| Dung beetles              | 0.08         | 0.26     | 0.24           | 0.25     | 0.08             | 0.45     | 0.04                   | 0.45     |
| Grasshoppers              | 0.09         | 0.25     | 0.31           | 0.77     | 0.83             | 0.09     | 0.25                   | 0.25     |
| Large mammals             | 0.03         | 0.33     | -0.26          | 0.76     | 0.31             | 0.21     | 0.48                   | 0.09     |
| Lizards                   | -0.03        | 0.55     | -0.50          | 0.95     | 0.16             | 0.67     | 0.03                   | 0.45     |
| Moths                     | -0.01        | 0.51     | -0.60          | 0.95     | 0.81             | 0.07     | 0.05                   | 0.48     |
| Small mammals             | 0.001        | 0.56     | -0.29          | 0.80     | -0.12            | 0.55     | -0.31                  | 0.82     |
| Trees and Lianas          | -0.001       | 0.54     | 0.13           | 0.34     | -0.03            | 0.54     | -                      | -        |
