# Supplementary material
Source: PubMed Central journal article supplement (PMC2141815)
Supplement: pnas_0703333104_6.pdf [file pnas_0703333104_6.pdf]

**Table 2.** ANOSIM test results for differences between habitats, based on community composition (presence-absence data) and community structure (square-root transformed and site standardized). R values are shown for all pairwise between habitat comparisons. Significant comparisons are in bold.  $P = * < 0.05$ ,  $** < 0.01$

| Taxonomic group           | Group code | Community composition |               |               | Community structure |               |               |
|---------------------------|------------|-----------------------|---------------|---------------|---------------------|---------------|---------------|
|                           |            | PF-SF                 | PF-EUC        | SF-EUC        | PF-SF               | PF-EUC        | SF-EUC        |
| Trees and Lianas          | TL         | <b>1.0**</b>          | <b>1.0**</b>  | <b>1.0**</b>  | <b>0.99**</b>       | <b>1.0**</b>  | <b>1.0**</b>  |
| Birds                     | BI         | <b>1.0**</b>          | <b>1.0**</b>  | <b>0.92**</b> | <b>1.0**</b>        | <b>1.0**</b>  | <b>0.98**</b> |
| Fruit-feeding butterflies | BU         | <b>0.64**</b>         | <b>0.81**</b> | <b>0.76**</b> | <b>0.88**</b>       | <b>1.0**</b>  | <b>0.96**</b> |
| Leaf-litter amphibians    | AM         | 0.26                  | <b>0.41**</b> | <b>0.80**</b> | <b>0.26*</b>        | <b>0.51**</b> | <b>0.88**</b> |
| Large mammals             | LM         | <b>0.44*</b>          | <b>0.61**</b> | <b>0.49**</b> | <b>0.80**</b>       | <b>1.0**</b>  | <b>0.96**</b> |
| Bats                      | BA         | <b>0.63**</b>         | <b>0.40*</b>  | <b>0.41**</b> | <b>0.77**</b>       | <b>0.49**</b> | <b>0.45**</b> |
| Lizards                   | LZ         | <b>0.70**</b>         | <b>0.91**</b> | 0.27          | <b>0.56**</b>       | <b>1.0**</b>  | <b>0.83**</b> |
| Dung beetles              | DB         | <b>0.72**</b>         | <b>0.64**</b> | <b>0.48**</b> | <b>0.67**</b>       | <b>0.60**</b> | <b>0.48*</b>  |
| Epigeic arachnids         | AR         | 0.22                  | <b>0.75**</b> | <b>0.43*</b>  | <b>0.39*</b>        | <b>0.83**</b> | <b>0.53*</b>  |
| Grasshoppers              | GH         | <b>0.55**</b>         | <b>0.87**</b> | <b>0.32*</b>  | <b>0.64**</b>       | <b>0.94**</b> | <b>0.31*</b>  |
| Scavenger flies           | SF         | <b>0.61**</b>         | <b>0.82**</b> | 0.10          | <b>0.40*</b>        | <b>0.79**</b> | <b>0.42*</b>  |
| Fruit flies               | FF         | 0.21                  | <b>0.55**</b> | 0.14          | <b>0.46*</b>        | <b>0.79**</b> | 0.06          |
| Small mammals             | SM         | 0.18                  | <b>0.47**</b> | 0.07          | <b>0.25*</b>        | <b>0.43**</b> | 0.03          |
| Orchid bees               | OB         | 0.70                  | <b>0.29*</b>  | -0.15         | <b>0.31*</b>        | <b>0.35*</b>  | -0.02         |
| Moths                     | MO         | <b>0.51**</b>         | <b>0.85**</b> | <b>0.38**</b> | <b>0.51**</b>       | <b>0.95**</b> | <b>0.52**</b> |
