# Supplementary material
Source: PubMed Central journal article supplement (PMC2141815)
Supplement: pnas_0703333104_7.pdf [file pnas_0703333104_7.pdf]

Table 3. Cross-taxa congruence based on community composition (presence-absence data), community structure, abundance, observed species richness, and estimated species richness. Spearman's correlations ( $r_s$ ) were used for species richness and abundance; RELATE tests were used for community composition and structure data. \* =  $P < 0.05$ , \*\* =  $P < 0.01$ . Correlations significant at  $P < 0.01$  are shown in bold.

|                    | Amphibians    | Lizards       | Birds         | Bats          | Small mammals | Large mammals | Butterflies   | Moths         | Orchid bees   | Scavenger flies | Fruit flies   | Grasshoppers  | Dung beetles  | Arachnids     | Trees and Lianas |
|--------------------|---------------|---------------|---------------|---------------|---------------|---------------|---------------|---------------|---------------|-----------------|---------------|---------------|---------------|---------------|------------------|
| <i>Composition</i> |               |               |               |               |               |               |               |               |               |                 |               |               |               |               |                  |
| Amphibians         |               | <b>0.34**</b> | <b>0.34**</b> | <b>0.34**</b> | 0.06          | 0.22          | <b>0.37**</b> | 0.13          | -0.08         | 0.14            | 0             | 0.01          | 0.19          | <b>0.38**</b> | <b>0.48**</b>    |
| Lizards            | <b>0.34**</b> |               | <b>0.67**</b> | 0.26*         | 0.18          | <b>0.52**</b> | <b>0.63**</b> | <b>0.33**</b> | 0.26*         | <b>0.57**</b>   | 0.17          | 0.26*         | <b>0.56**</b> | <b>0.55**</b> | <b>0.52**</b>    |
| Birds              | <b>0.34**</b> | <b>0.67**</b> |               | <b>0.3**</b>  | 0.23*         | <b>0.40**</b> | <b>0.72**</b> | <b>0.53**</b> | 0.1           | <b>0.62**</b>   | 0.29*         | <b>0.45**</b> | <b>0.50**</b> | <b>0.47**</b> | <b>0.67**</b>    |
| Bats               | <b>0.34**</b> | 0.26*         | <b>0.3**</b>  |               | -0.03         | -0.01         | <b>0.38**</b> | 0.04          | -0.13         | 0.1             | -0.3          | 0.19          | 0.02          | 0.13          | 0.22*            |
| Small mammals      | 0.06          | 0.18          | 0.23*         | -0.03         |               | <b>0.40**</b> | 0.04          | 0.23*         | 0.27*         | 0.09            | 0.15          | 0.03          | 0.38*         | 0.30*         | 0.21*            |
| Large mammals      | 0.22          | <b>0.52**</b> | <b>0.40**</b> | -0.01         | <b>0.40**</b> |               | 0.11          | <b>0.38**</b> | 0.25*         | <b>0.38**</b>   | 0.19          | 0.12          | <b>0.75**</b> | <b>0.43**</b> | <b>0.59**</b>    |
| Butterflies        | <b>0.37**</b> | <b>0.63**</b> | <b>0.72**</b> | <b>0.38**</b> | 0.04          | 0.11          |               | 0.28*         | 0.06          | <b>0.55**</b>   | 0.06          | 0.31*         | 0.2           | <b>0.32**</b> | <b>0.43**</b>    |
| Moths              | 0.13          | <b>0.33**</b> | <b>0.53**</b> | 0.04          | 0.23*         | <b>0.38**</b> | 0.28*         |               | -0.11         | 0.31*           | <b>0.36**</b> | <b>0.56**</b> | <b>0.41**</b> | <b>0.33**</b> | <b>0.50**</b>    |
| Orchid bees        | -0.08         | 0.26*         | 0.1           | -0.13         | 0.27*         | 0.25*         | 0.06          | -0.11         |               | 0.19            | -0.04         | -0.1          | 0.24          | 0.26*         | 0.02             |
| Scavenger flies    | 0.14          | <b>0.57**</b> | <b>0.62**</b> | 0.1           | 0.09          | <b>0.38**</b> | <b>0.55**</b> | 0.31*         | 0.19          |                 | 0.03          | 0.29*         | <b>0.51**</b> | 0.24*         | <b>0.36**</b>    |
| Fruit flies        | 0             | 0.17          | 0.29*         | -0.3          | 0.15          | 0.19          | 0.06          | <b>0.36**</b> | -0.04         | 0.03            |               | 0.19          | 0.29*         | 0.21          | <b>0.28**</b>    |
| Grasshoppers       | 0.01          | 0.26*         | <b>0.45**</b> | 0.19          | 0.03          | 0.12          | 0.31*         | <b>0.56**</b> | -0.1          | 0.29*           | 0.19          |               | 0.24*         | <b>0.36**</b> | <b>0.37**</b>    |
| Dung beetles       | 0.19          | <b>0.56**</b> | <b>0.50**</b> | 0.02          | 0.38*         | <b>0.75**</b> | 0.2           | <b>0.41**</b> | 0.24          | <b>0.51**</b>   | 0.29*         | 0.24*         |               | <b>0.43**</b> | <b>0.54**</b>    |
| Arachnids          | <b>0.38**</b> | <b>0.55**</b> | <b>0.47**</b> | 0.13          | 0.30*         | <b>0.43**</b> | <b>0.32**</b> | <b>0.33**</b> | 0.26*         | 0.24*           | 0.21          | <b>0.36**</b> | <b>0.43**</b> |               | <b>0.46**</b>    |
| Trees and Lianas   | <b>0.48**</b> | <b>0.52**</b> | <b>0.67**</b> | 0.22*         | 0.21*         | <b>0.59**</b> | <b>0.43**</b> | <b>0.50**</b> | 0.02          | <b>0.36**</b>   | <b>0.28**</b> | <b>0.37**</b> | <b>0.54**</b> | <b>0.46**</b> |                  |
| <i>Structure</i>   |               |               |               |               |               |               |               |               |               |                 |               |               |               |               |                  |
| Amphibians         |               | 0.27*         | 0.30*         | 0.08          | 0.14          | <b>0.35**</b> | <b>0.35**</b> | 0.16          | 0.05          | 0.06            | 0.02          | 0.11          | 0.07          | 0.24*         | <b>0.47**</b>    |
| Lizards            | 0.27*         |               | <b>0.69**</b> | 0.19          | 0.16          | <b>0.80**</b> | <b>0.85**</b> | <b>0.53**</b> | 0.20*         | <b>0.50**</b>   | <b>0.44**</b> | <b>0.45**</b> | <b>0.69**</b> | <b>0.80**</b> | <b>0.77**</b>    |
| Birds              | 0.30*         | <b>0.69**</b> |               | <b>0.44**</b> | 0.22*         | <b>0.69**</b> | <b>0.79**</b> | <b>0.59**</b> | <b>0.30**</b> | <b>0.54**</b>   | <b>0.44**</b> | <b>0.54**</b> | <b>0.48**</b> | <b>0.54**</b> | <b>0.71**</b>    |
| Bats               | 0.08          | 0.19          | <b>0.44**</b> |               | -0.03         | 0.02          | <b>0.32**</b> | 0.24*         | -0.04         | 0.13            | 0.19          | <b>0.42**</b> | 0.07          | 0.18          | 0.28*            |
| Small mammals      | 0.14          | 0.16          | 0.22*         | -0.03         |               | <b>0.39**</b> | 0.18          | 0.17          | 0.34*         | 0.2             | <b>0.42**</b> | 0.05          | 0.32*         | 0.21*         | 0.18*            |
| Large mammals      | <b>0.35**</b> | <b>0.80**</b> | <b>0.69**</b> | 0.02          | <b>0.39**</b> |               | <b>0.82**</b> | <b>0.53**</b> | 0.27*         | <b>0.50**</b>   | <b>0.49**</b> | 0.35*         | <b>0.77**</b> | <b>0.66**</b> | <b>0.80**</b>    |
| Butterflies        | <b>0.35**</b> | <b>0.85**</b> | <b>0.79**</b> | <b>0.32**</b> | 0.18          | <b>0.82**</b> |               | <b>0.61**</b> | 0.24*         | <b>0.59**</b>   | <b>0.49**</b> | <b>0.48**</b> | <b>0.64**</b> | <b>0.69**</b> | <b>0.80**</b>    |
| Moths              | 0.16          | <b>0.53**</b> | <b>0.59**</b> | 0.24*         | 0.17          | <b>0.53**</b> | <b>0.61**</b> |               | 0.22          | <b>0.35**</b>   | <b>0.47**</b> | <b>0.72**</b> | <b>0.41**</b> | <b>0.41**</b> | <b>0.60**</b>    |

|                                 |               |               |               |               |               |               |               |               |               |               |               |               |               |               |               |
|---------------------------------|---------------|---------------|---------------|---------------|---------------|---------------|---------------|---------------|---------------|---------------|---------------|---------------|---------------|---------------|---------------|
| Orchid bees                     | 0.05          | 0.20*         | <b>0.30**</b> | -0.04         | 0.34*         | 0.27*         | 0.24*         | 0.22          |               | <b>0.41**</b> | 0.21          | 0.18          | 0.25          | 0.25*         | 0.04          |
| Scavenger flies                 | 0.06          | <b>0.50**</b> | <b>0.54**</b> | 0.13          | 0.2           | <b>0.50**</b> | <b>0.59**</b> | <b>0.35**</b> | <b>0.41**</b> |               | <b>0.41**</b> | 0.26*         | <b>0.47**</b> | <b>0.41**</b> | <b>0.42**</b> |
| Fruit flies                     | 0.02          | <b>0.44**</b> | <b>0.44**</b> | 0.19          | <b>0.42**</b> | <b>0.49**</b> | <b>0.49**</b> | <b>0.47**</b> | 0.21          | <b>0.41**</b> |               | <b>0.31**</b> | <b>0.42**</b> | <b>0.34**</b> | <b>0.40**</b> |
| Grasshoppers                    | 0.11          | <b>0.45**</b> | <b>0.54**</b> | <b>0.42**</b> | 0.05          | 0.35*         | <b>0.48**</b> | <b>0.72**</b> | 0.18          | 0.26*         | <b>0.31**</b> |               | 0.27*         | <b>0.43**</b> | <b>0.44**</b> |
| Dung beetles                    | 0.07          | <b>0.69**</b> | <b>0.48**</b> | 0.07          | 0.32*         | <b>0.77**</b> | <b>0.64**</b> | <b>0.41**</b> | 0.25          | <b>0.47**</b> | <b>0.42**</b> | 0.27*         |               | <b>0.66**</b> | <b>0.54**</b> |
| Arachnids                       | 0.24*         | <b>0.80**</b> | <b>0.54**</b> | 0.18          | 0.21*         | <b>0.66**</b> | <b>0.69**</b> | <b>0.41**</b> | 0.25*         | <b>0.41**</b> | <b>0.34**</b> | <b>0.43**</b> | <b>0.66**</b> |               | <b>0.58**</b> |
| Trees and Lianas                | <b>0.47**</b> | <b>0.77**</b> | <b>0.71**</b> | 0.28*         | 0.18*         | <b>0.80**</b> | <b>0.80**</b> | <b>0.60**</b> | 0.04          | <b>0.42**</b> | <b>0.40**</b> | <b>0.44**</b> | <b>0.54**</b> | <b>0.58**</b> |               |
| <i>Abundance</i>                |               |               |               |               |               |               |               |               |               |               |               |               |               |               |               |
| Amphibians                      |               | 0.59*         | 0.04          | 0.36          | -0.33         | -0.19         | 0.42          | 0.52*         | 0.09          | -0.08         | 0.20          | 0.45          | 0.24          | -0.01         | 0.06          |
| Lizards                         | 0.59*         |               | 0.25          | 0.19          | -0.49         | -0.28         | 0.54          | <b>0.69**</b> | -0.25         | 0.12          | 0.19          | 0.49          | -0.02         | 0.26          | 0.16          |
| Birds                           | 0.04          | 0.25          |               | -0.24         | 0.17          | 0.14          | 0.06          | 0.04          | 0.16          | 0.20          | 0.19          | -0.36         | -0.20         | -0.27         | -0.02         |
| Bats                            | 0.36          | 0.19          | -0.24         |               | -0.31         | -0.10         | 0.08          | 0.24          | -0.29         | 0.35          | -0.15         | 0.00          | 0.04          | 0.24          | -0.07         |
| Small mammals                   | -0.33         | -0.49         | 0.17          | -0.31         |               | 0.34          | -0.56*        | -0.12         | <b>0.71**</b> | -0.46         | 0.32          | -0.38         | 0.49          | -0.58*        | 0.06          |
| Large mammals                   | -0.19         | -0.28         | 0.14          | -0.10         | 0.34          |               | -0.49         | -0.37         | 0.55*         | -0.02         | 0.02          | -0.33         | 0.18          | -0.54*        | -0.48         |
| Butterflies                     | 0.42          | 0.54          | 0.06          | 0.08          | -0.56*        | -0.49         |               | 0.37          | -0.23         | 0.45          | -0.24         | <b>0.74**</b> | -0.44         | <b>0.69**</b> | 0.34          |
| Moths                           | 0.52*         | <b>0.69**</b> | 0.04          | 0.24          | -0.12         | -0.37         | 0.37          |               | 0.14          | -0.06         | 0.40          | 0.46          | 0.25          | 0.23          | 0.12          |
| Orchid bees                     | 0.09          | -0.25         | 0.16          | -0.29         | <b>0.71**</b> | 0.55*         | -0.23         | 0.14          |               | -0.39         | 0.29          | 0.00          | 0.54*         | -0.50         | -0.22         |
| Scavenger flies                 | -0.08         | 0.12          | 0.20          | 0.35          | -0.46         | -0.02         | 0.45          | -0.06         | -0.39         |               | -0.14         | -0.09         | -0.54*        | 0.31          | -0.04         |
| Fruit flies                     | 0.20          | 0.19          | 0.19          | -0.15         | 0.32          | 0.02          | -0.24         | 0.40          | 0.29          | -0.14         |               | -0.14         | 0.52*         | -0.58*        | 0.16          |
| Grasshoppers                    | 0.45          | 0.49          | -0.36         | 0.00          | -0.38         | -0.33         | <b>0.74**</b> | 0.46          | 0.00          | -0.09         | -0.14         |               | -0.11         | 0.57*         | 0.43          |
| Dung beetles                    | 0.24          | -0.02         | -0.20         | 0.04          | 0.49          | 0.18          | -0.44         | 0.25          | 0.54*         | -0.54*        | 0.52*         | -0.11         |               | -0.57*        | -0.32         |
| Arachnids                       | -0.01         | 0.26          | -0.27         | 0.24          | -0.58*        | -0.54*        | <b>0.69**</b> | 0.23          | -0.50         | 0.31          | -0.58         | 0.57*         | -0.57*        |               | 0.23          |
| Trees and Lianas                | 0.06          | 0.16          | -0.02         | -0.07         | 0.06          | -0.48         | 0.34          | 0.12          | -0.22         | -0.04         | 0.16          | 0.43          | -0.32         | 0.23          |               |
| <i>Estimated richness (ACE)</i> |               |               |               |               |               |               |               |               |               |               |               |               |               |               |               |
| Amphibians                      |               | <b>0.73**</b> | <b>0.83**</b> | 0.27          | 0.30          | 0.53*         | 0.24          | 0.07          | 0.02          | -0.13         | -0.16         | -0.45         | <b>0.80**</b> | 0.06          | 0.77          |
| Lizards                         | <b>0.73**</b> |               | <b>0.83**</b> | 0.30          | 0.40          | 0.63*         | 0.41          | 0.17          | 0.15          | -0.08         | 0.00          | -0.33         | <b>0.82**</b> | 0.14          | 0.80          |
| Birds                           | <b>0.83**</b> | <b>0.83**</b> |               | 0.44          | 0.32          | 0.58*         | 0.24          | 0.10          | 0.12          | -0.19         | 0.06          | -0.35         | <b>0.92**</b> | -0.10         | 0.93          |
| Bats                            | 0.27          | 0.30          | 0.44          |               | -0.12         | 0.26          | 0.15          | 0.07          | -0.21         | -0.01         | -0.12         | -0.21         | 0.25          | -0.13         | 0.38          |
| Small mammals                   | 0.30          | 0.40          | 0.32          | -0.12         |               | -0.07         | 0.54*         | 0.19          | 0.07          | 0.24          | 0.38          | -0.16         | 0.33          | -0.31         | 0.33          |
| Large mammals                   | 0.53*         | 0.63*         | 0.58*         | 0.26          | -0.07         |               | 0.34          | -0.30         | 0.27          | 0.22          | -0.41         | -0.33         | 0.49          | 0.09          | 0.56*         |
| Butterflies                     | 0.24          | 0.41          | 0.24          | 0.15          | 0.54*         | 0.34          |               | -0.01         | -0.36         | <b>0.66**</b> | 0.05          | -0.17         | 0.28          | 0.05          | 0.34          |
| Moths                           | 0.07          | 0.17          | 0.10          | 0.07          | 0.19          | -0.30         | -0.01         |               | -0.08         | -0.03         | 0.11          | 0.23          | 0.27          | 0.22          | 0.11          |
| Orchid bees                     | 0.02          | 0.15          | 0.12          | -0.21         | 0.07          | 0.27          | -0.36         | -0.08         |               | -0.31         | -0.14         | 0.22          | 0.10          | 0.00          | 0.04          |
| Scavenger flies                 | -0.13         | -0.08         | -0.19         | -0.01         | 0.24          | 0.22          | <b>0.66**</b> | -0.03         | -0.31         |               | 0.02          | -0.33         | -0.20         | -0.12         | -0.06         |
| Fruit flies                     | -0.16         | 0.00          | 0.06          | -0.12         | 0.38          | -0.41         | 0.05          | 0.11          | -0.14         | 0.02          |               | -0.08         | 0.05          | -0.25         | 0.03          |

|                          |               |               |               |               |       |               |       |       |       |       |       |       |               |               |               |
|--------------------------|---------------|---------------|---------------|---------------|-------|---------------|-------|-------|-------|-------|-------|-------|---------------|---------------|---------------|
| Grasshoppers             | -0.45         | -0.33         | -0.35         | -0.21         | -0.16 | -0.33         | -0.17 | 0.23  | 0.22  | -0.33 | -0.08 |       | -0.19         | 0.41          | -0.28         |
| Dung beetles             | <b>0.80**</b> | <b>0.82**</b> | <b>0.92**</b> | 0.25          | 0.33  | 0.49          | 0.28  | 0.27  | 0.10  | -0.20 | 0.05  | -0.19 | 0.12          | <b>0.89**</b> |               |
| Arachnids                | 0.06          | 0.14          | -0.10         | -0.13         | -0.31 | 0.09          | 0.05  | 0.22  | 0.00  | -0.12 | -0.25 | 0.41  | 0.12          |               | -0.03         |
| Trees and Lianas         | <b>0.77**</b> | <b>0.80**</b> | <b>0.93**</b> | 0.38          | 0.33  | 0.56*         | 0.34  | 0.11  | 0.04  | -0.06 | 0.03  | -0.28 | <b>0.89**</b> | -0.03         |               |
| <i>Observed richness</i> |               |               |               |               |       |               |       |       |       |       |       |       |               |               |               |
| Amphibians               |               | <b>0.74**</b> | <b>0.82**</b> | 0.41          | 0.41  | <b>0.83**</b> | 0.4   | 0.11  | 0.27  | -0.09 | -0.26 | -0.36 | <b>0.67**</b> | -0.29         | <b>0.75**</b> |
| Lizards                  | <b>0.74**</b> |               | <b>0.91**</b> | <b>0.68**</b> | 0.45  | <b>0.85**</b> | 0.48  | 0.26  | 0.2   | -0.29 | 0.02  | -0.08 | <b>0.90**</b> | 0.07          | <b>0.77**</b> |
| Birds                    | <b>0.82**</b> | <b>0.91**</b> |               | <b>0.66**</b> | 0.49  | <b>0.86**</b> | 0.35  | 0.1   | 0.26  | -0.42 | 0.04  | -0.36 | <b>0.87**</b> | -0.19         | <b>0.91**</b> |
| Bats                     | 0.41          | <b>0.68**</b> | <b>0.66**</b> |               | 0     | 0.49          | 0.01  | 0.02  | 0.01  | -0.31 | -0.19 | -0.19 | 0.57*         | 0.02          | 0.62*         |
| Small mammals            | 0.41          | 0.45          | 0.49          | 0             |       | 0.42          | 0.64* | 0.06  | 0.45  | 0.03  | 0.17  | -0.19 | 0.47          | 0.08          | 0.45          |
| Large mammals            | <b>0.83**</b> | <b>0.85**</b> | <b>0.86**</b> | 0.49          | 0.42  |               | 0.38  | 0.01  | 0.34  | -0.23 | -0.18 | -0.17 | <b>0.76**</b> | 0.02          | <b>0.73**</b> |
| Butterflies              | 0.4           | 0.48          | 0.35          | 0.01          | 0.64* | 0.38          |       | 0.42  | 0.33  | 0.16  | 0.26  | 0.19  | 0.41          | 0.02          | 0.22          |
| Moths                    | 0.11          | 0.26          | 0.1           | 0.02          | 0.06  | 0.01          | 0.42  |       | 0.03  | 0.03  | 0.18  | 0.27  | 0.38          | 0.16          | -0.01         |
| Orchid bees              | 0.27          | 0.2           | 0.26          | 0.01          | 0.45  | 0.34          | 0.33  | 0.03  |       | -0.29 | 0.02  | 0.17  | 0.27          | 0.02          | 0.16          |
| Scavenger flies          | -0.09         | -0.29         | -0.42         | -0.31         | 0.03  | -0.23         | 0.16  | 0.03  | -0.29 |       | -0.43 | -0.08 | -0.4          | 0.01          | -0.5          |
| Fruit flies              | -0.26         | 0.02          | 0.04          | -0.19         | 0.17  | -0.18         | 0.26  | 0.18  | 0.02  | -0.43 |       | 0.15  | 0.14          | -0.02         | 0.03          |
| Grasshoppers             | -0.36         | -0.08         | -0.36         | -0.19         | -0.19 | -0.17         | 0.19  | 0.27  | 0.17  | -0.08 | 0.15  |       | -0.09         | 0.53*         | -0.45         |
| Dung beetles             | <b>0.67**</b> | <b>0.90**</b> | <b>0.87**</b> | 0.57*         | 0.47  | <b>0.76**</b> | 0.41  | 0.38  | 0.27  | -0.4  | 0.14  | -0.09 |               | 0.03          | <b>0.82**</b> |
| Arachnids                | -0.29         | 0.07          | -0.19         | 0.02          | 0.08  | 0.02          | 0.02  | 0.16  | 0.02  | 0.01  | -0.02 | 0.53* | 0.03          |               | -0.17         |
| Trees and Lianas         | <b>0.75**</b> | <b>0.77**</b> | <b>0.91**</b> | 0.62*         | 0.45  | <b>0.73**</b> | 0.22  | -0.01 | 0.16  | -0.5  | 0.03  | -0.45 | <b>0.82**</b> | -0.17         |               |
