# Supplementary material
Source: PubMed Central journal article supplement (PMC2141815)
Supplement: pnas_0703333104_8.pdf [file pnas_0703333104_8.pdf]

Table 4. Cross-taxa congruence based on community structure for primary and secondary forest comparisons only (n=10). RELATE tests were used to test significance. Correlations significant at  $P < 0.05$  are shown in bold.

|                  | Amphibians  | Lizards     | Birds       | Bats        | Small mammals | Large mammals | Butterflies | Moths       | Orchid bees | Blowflies   | Fruit flies | Grasshoppers | Dung beetles | Arachnids   | Trees and Lianas |
|------------------|-------------|-------------|-------------|-------------|---------------|---------------|-------------|-------------|-------------|-------------|-------------|--------------|--------------|-------------|------------------|
| <i>Structure</i> |             |             |             |             |               |               |             |             |             |             |             |              |              |             |                  |
| Amphibians       |             | 0.07        | <b>0.29</b> | 0.13        | 0.25          | 0.17          | <b>0.41</b> | -0.03       | 0.24        | 0.22        | 0.15        | -0.22        | 0.05         | 0.11        | 0.04             |
| Lizards          | 0.07        |             | <b>0.63</b> | 0.25        | 0.06          | <b>0.52</b>   | <b>0.38</b> | <b>0.36</b> | 0.11        | 0.16        | <b>0.38</b> | <b>0.51</b>  | <b>0.37</b>  | <b>0.61</b> | <b>0.54</b>      |
| Birds            | <b>0.29</b> | <b>0.63</b> |             | <b>0.59</b> | 0.2           | <b>0.73</b>   | <b>0.76</b> | <b>0.41</b> | <b>0.31</b> | <b>0.44</b> | <b>0.34</b> | <b>0.52</b>  | <b>0.63</b>  | <b>0.42</b> | <b>0.79</b>      |
| Bats             | 0.13        | 0.25        | <b>0.59</b> |             | 0.03          | <b>0.39</b>   | <b>0.61</b> | 0.16        | -0.02       | 0.24        | 0.27        | <b>0.36</b>  | 0.17         | 0.22        | <b>0.57</b>      |
| Small mammals    | 0.25        | 0.06        | 0.2         | 0.03        |               | <b>0.37</b>   | 0.2         | 0.08        | <b>0.38</b> | 0.16        | <b>0.45</b> | 0.04         | 0.34         | 0.16        | 0.01             |
| Large mammals    | 0.17        | <b>0.52</b> | <b>0.73</b> | <b>0.39</b> | <b>0.37</b>   |               | <b>0.61</b> | <b>0.49</b> | <b>0.42</b> | <b>0.31</b> | <b>0.42</b> | <b>0.58</b>  | <b>0.63</b>  | <b>0.44</b> | <b>0.56</b>      |
| Butterflies      | <b>0.41</b> | <b>0.38</b> | <b>0.76</b> | <b>0.61</b> | 0.2           | <b>0.61</b>   |             | <b>0.5</b>  | <b>0.27</b> | <b>0.54</b> | <b>0.39</b> | 0.44         | <b>0.34</b>  | 0.25        | <b>0.63</b>      |
| Moths            | -0.03       | <b>0.36</b> | <b>0.41</b> | 0.16        | 0.08          | <b>0.49</b>   | <b>0.5</b>  |             | 0.11        | 0.13        | <b>0.41</b> | <b>0.77</b>  | 0.27         | <b>0.29</b> | <b>0.45</b>      |
| Orchid bees      | 0.24        | 0.11        | <b>0.31</b> | -0.02       | <b>0.38</b>   | <b>0.42</b>   | <b>0.27</b> | 0.11        |             | <b>0.47</b> | 0.15        | 0.2          | <b>0.47</b>  | 0.28        | 0.1              |
| Scavenger flies  | 0.22        | 0.16        | <b>0.44</b> | 0.24        | 0.16          | <b>0.31</b>   | <b>0.54</b> | 0.13        | <b>0.47</b> |             | 0.28        | 0.19         | <b>0.42</b>  | 0.1         | 0.21             |
| Fruit flies      | 0.15        | <b>0.38</b> | <b>0.34</b> | 0.27        | <b>0.45</b>   | <b>0.42</b>   | <b>0.39</b> | <b>0.41</b> | 0.15        | 0.28        |             | <b>0.36</b>  | 0.21         | <b>0.36</b> | <b>0.34</b>      |
| Grasshoppers     | -0.22       | <b>0.51</b> | <b>0.52</b> | <b>0.36</b> | 0.04          | <b>0.58</b>   | 0.44        | <b>0.77</b> | 0.2         | 0.19        | <b>0.36</b> |              | <b>0.39</b>  | <b>0.51</b> | <b>0.57</b>      |
| Dung beetles     | 0.05        | <b>0.37</b> | <b>0.63</b> | 0.17        | 0.34          | <b>0.63</b>   | <b>0.34</b> | 0.27        | <b>0.47</b> | <b>0.42</b> | 0.21        | <b>0.39</b>  |              | <b>0.29</b> | <b>0.47</b>      |
| Arachnids        | 0.11        | <b>0.61</b> | <b>0.42</b> | 0.22        | 0.16          | <b>0.44</b>   | 0.25        | <b>0.29</b> | 0.28        | 0.1         | <b>0.36</b> | <b>0.51</b>  | <b>0.29</b>  |             | <b>0.44</b>      |
| Trees and Lianas | 0.04        | <b>0.54</b> | <b>0.79</b> | <b>0.57</b> | 0.01          | <b>0.56</b>   | <b>0.63</b> | <b>0.45</b> | 0.1         | 0.21        | <b>0.34</b> | <b>0.57</b>  | <b>0.47</b>  | <b>0.44</b> |                  |
