# Supplementary material
Source: PubMed Central journal article supplement (PMC2141815)

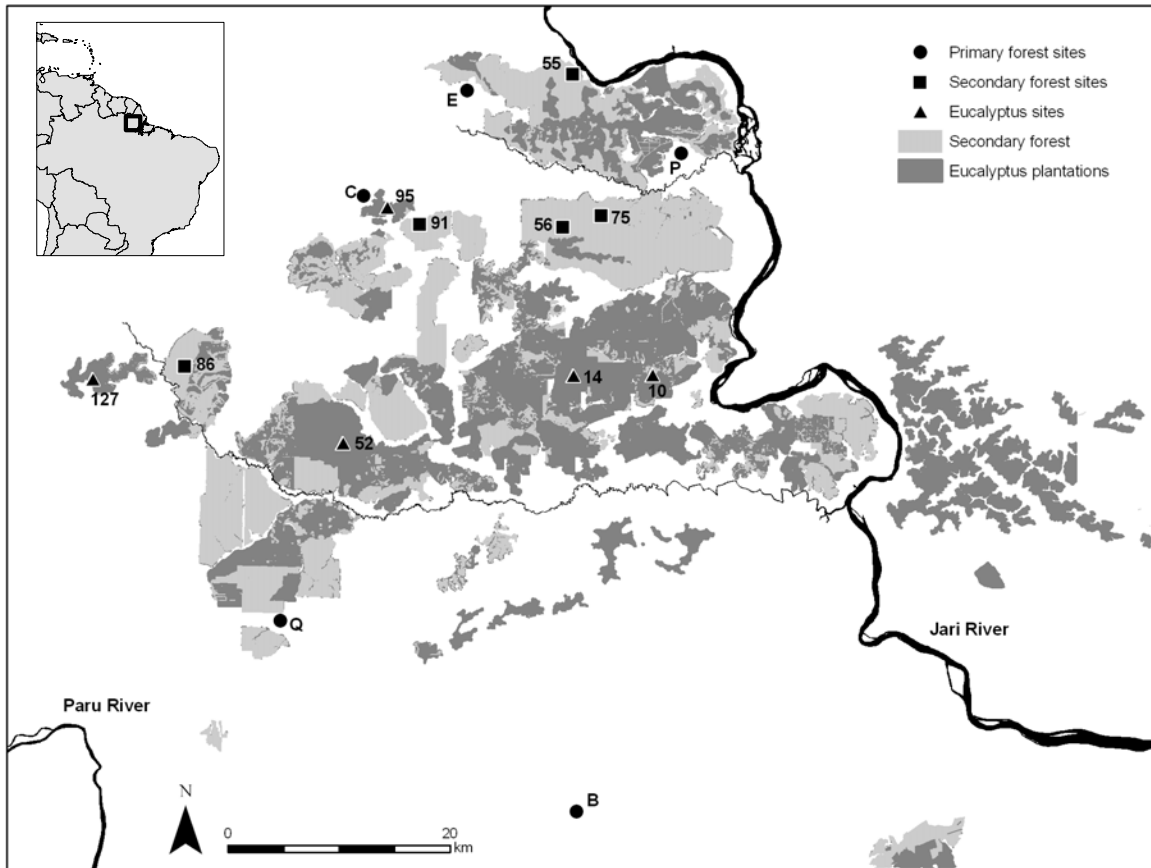

Supplement: pnas_0703333104_1.pdf [file pnas_0703333104_1.pdf]

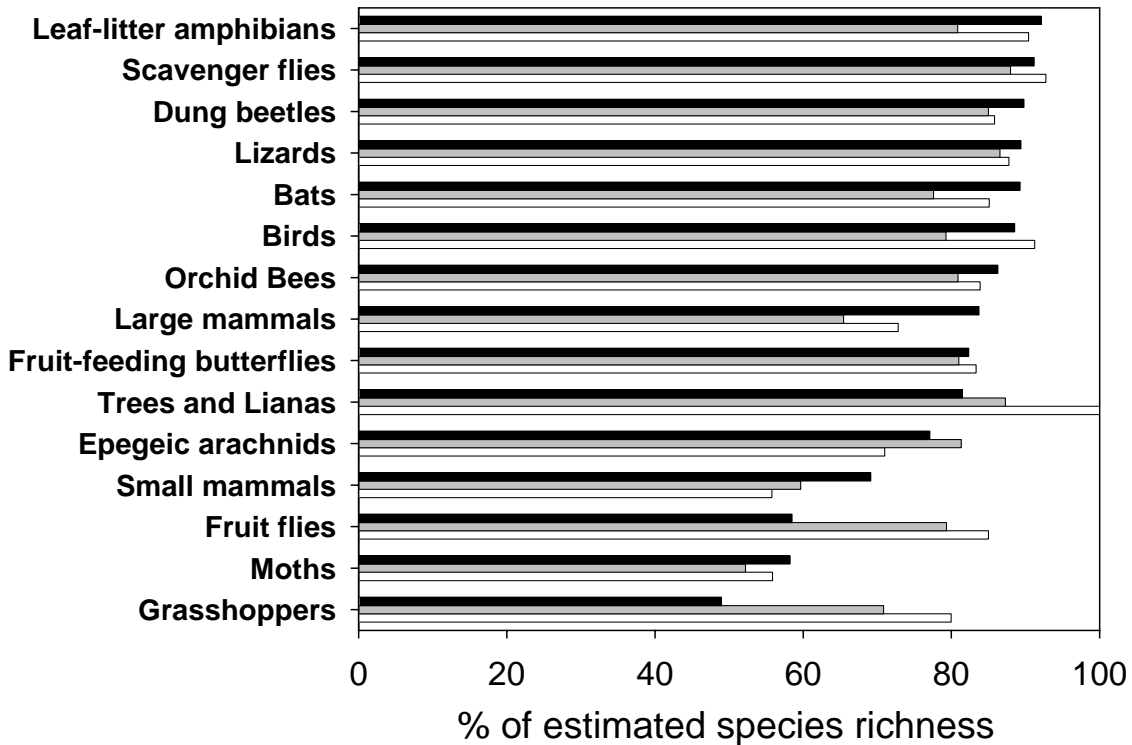

Supplement: pnas_0703333104_2.pdf [file pnas_0703333104_2.pdf]

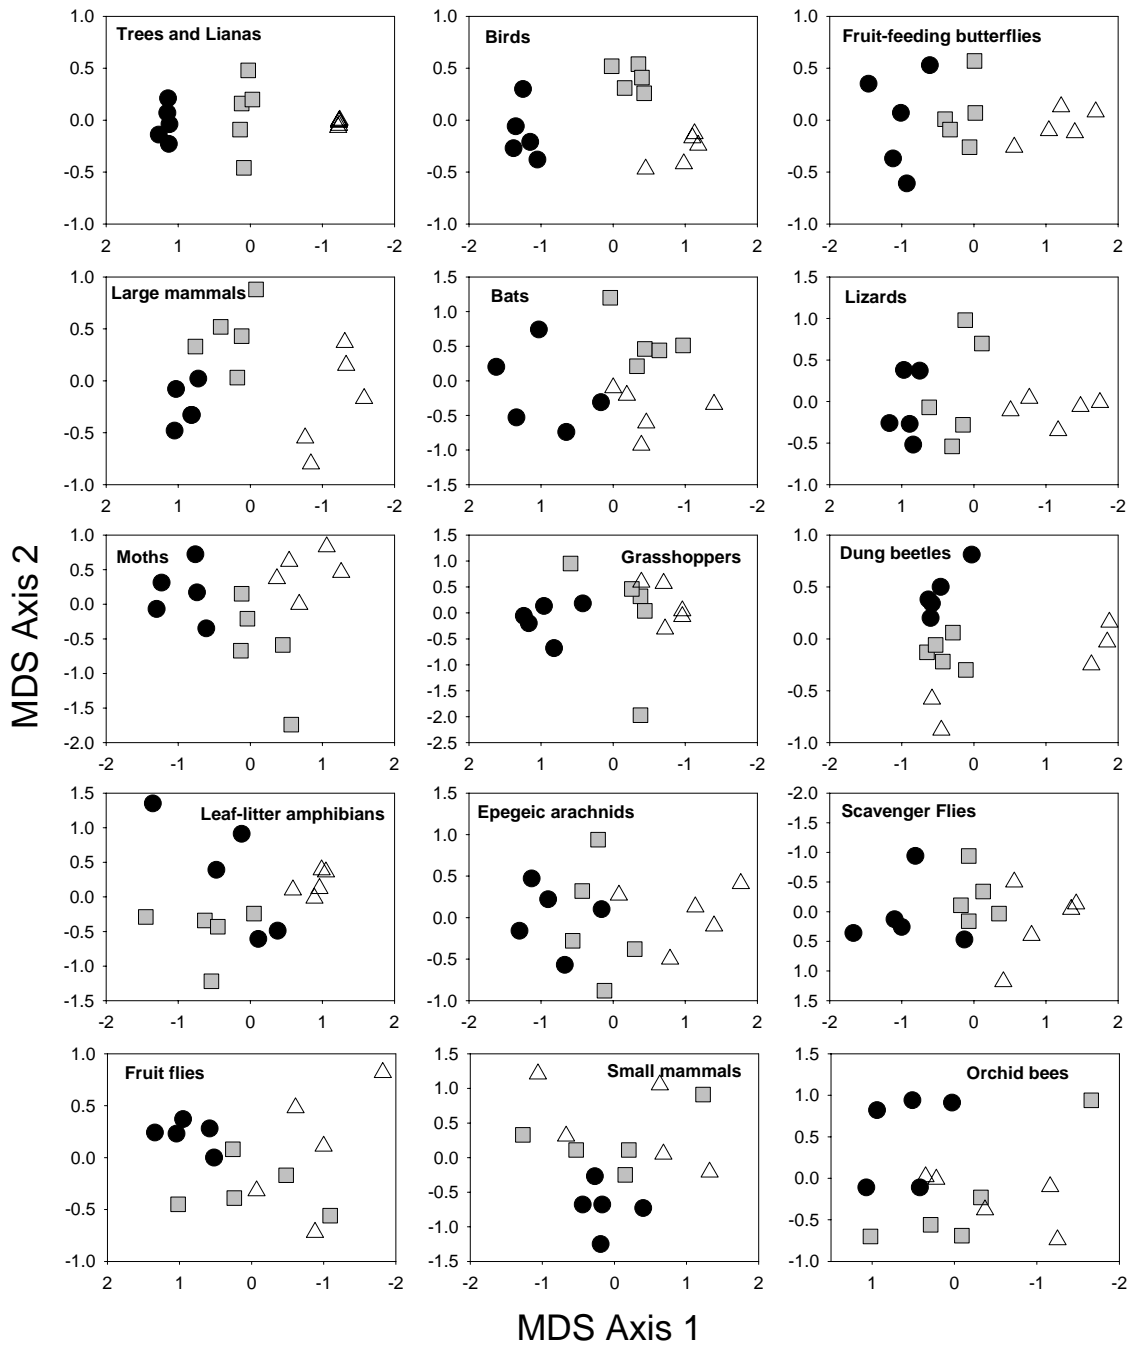

Supplement: pnas_0703333104_3.pdf [file pnas_0703333104_3.pdf]

**Mean ( $\pm$  SE) correlation coefficient with other taxa**

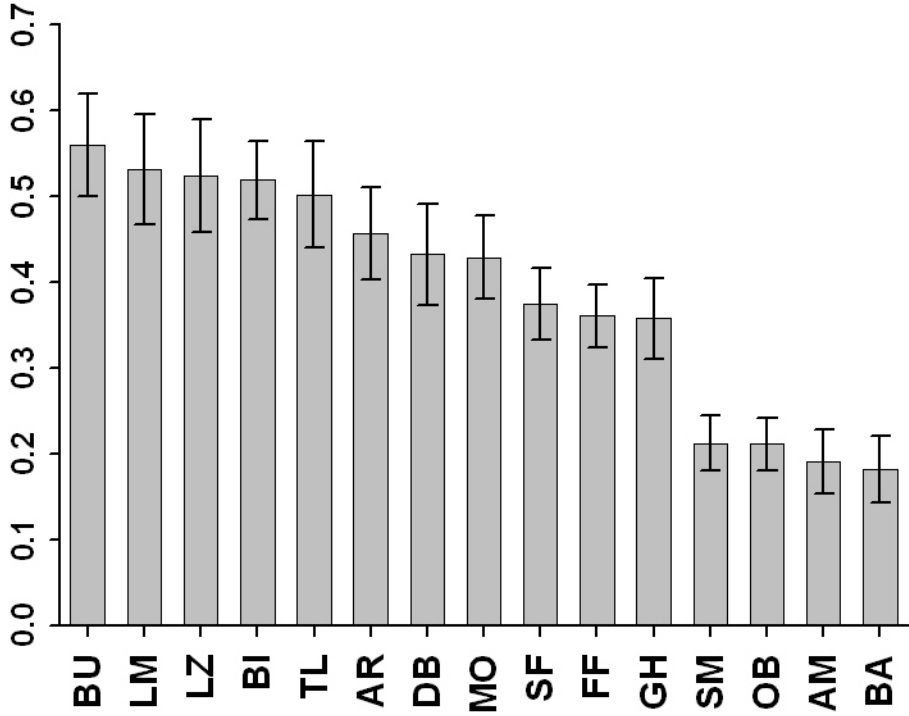

Supplement: pnas_0703333104_4.pdf [file pnas_0703333104_4.pdf]
